# Supplementary material for: Differential in Gel Electrophoresis (DIGE) Comparative Proteomic Analysis of Macrophages Cell Cultures in Response to Perthamide C Treatment
Source: MDPI journal article supplement (doi:10.3390/md11041288), 2013-04-17
Supplement: s1 [file s1]

marinedrugs-11-01288-s001.mol
  corina  04151405213D 1   1.00000     0.00000 
CORINA 3.49 0023  12.04.2013
 74 76  0  0  0  0  0  0  0  0999 V2000
   -4.9658    2.8780   -1.9668 C   0  0  0  0  0  0  0  0  0  0  0  0
   -5.2597    4.2146   -2.5978 C   0  0  0  0  0  0  0  0  0  0  0  0
   -3.6035    2.3751   -2.4486 C   0  0  0  0  0  0  0  0  0  0  0  0
   -2.5144    3.1240   -1.7268 C   0  0  0  0  0  0  0  0  0  0  0  0
   -1.4592    3.3674   -2.2730 O   0  0  0  0  0  0  0  0  0  0  0  0
   -2.7467    3.5229   -0.4396 N   0  0  0  0  0  0  0  0  0  0  0  0
   -1.6145    4.1904    0.2396 C   0  0  0  0  0  0  0  0  0  0  0  0
   -0.3849    4.1658   -0.6705 C   0  0  0  0  0  0  0  0  0  0  0  0
    0.7528    4.9486   -0.0118 C   0  0  0  0  0  0  0  0  0  0  0  0
   -1.9945    5.6174    0.5353 C   0  0  0  0  0  0  0  0  0  0  0  0
   -2.7396    6.2135   -0.2133 O   0  0  0  0  0  0  0  0  0  0  0  0
   -1.7270    7.6381    1.9833 C   0  0  0  0  0  0  0  0  0  0  0  0
   -1.3495    7.8222    3.4569 C   0  0  0  0  0  0  0  0  0  0  0  0
   -0.7153    6.4972    3.9058 C   0  0  0  0  0  0  0  0  0  0  0  0
   -0.6635    5.6105    2.6549 C   0  0  0  0  0  0  0  0  0  0  0  0
   -1.5070    6.2336    1.6328 N   0  0  0  0  0  0  0  0  0  0  0  0
   -0.8607    8.5150    1.1152 C   0  0  0  0  0  0  0  0  0  0  0  0
   -1.4532    9.5010    0.3785 N   0  0  0  0  0  0  0  0  0  0  0  0
   -0.5491   10.2706   -0.5062 C   0  0  0  0  0  0  0  0  0  0  0  0
    0.5654    9.3585   -1.0228 C   0  0  0  0  0  0  0  0  0  0  0  0
    0.3397    8.3478    1.0715 O   0  0  0  0  0  0  0  0  0  0  0  0
   -1.3535   10.7964   -1.6670 C   0  0  0  0  0  0  0  0  0  0  0  0
   -2.5583   10.9029   -1.5772 O   0  0  0  0  0  0  0  0  0  0  0  0
    1.6938    9.7494   -3.2220 C   0  0  0  0  0  0  0  0  0  0  0  0
    1.4874   10.1483   -1.9158 C   0  0  0  0  0  0  0  0  0  0  0  0
    2.5393   10.4740   -4.0420 C   0  0  0  0  0  0  0  0  0  0  0  0
    3.1800   11.5989   -3.5570 C   0  0  0  0  0  0  0  0  0  0  0  0
    2.9769   12.0020   -2.2511 C   0  0  0  0  0  0  0  0  0  0  0  0
    2.1293   11.2769   -1.4266 C   0  0  0  0  0  0  0  0  0  0  0  0
    0.6982    6.7424    4.4374 C   0  0  0  0  0  0  0  0  0  0  0  0
   -6.1515    4.3173   -3.4127 O   0  0  0  0  0  0  0  0  0  0  0  0
   -3.4986    2.5770   -3.8910 N   0  0  0  0  0  0  0  0  0  0  0  0
   -2.4038    2.1926   -4.5719 C   0  0  0  0  0  0  0  0  0  0  0  0
   -2.4072    2.2096   -6.0772 C   0  0  0  0  0  0  0  0  0  0  0  0
   -1.4129    1.8323   -3.9724 O   0  0  0  0  0  0  0  0  0  0  0  0
   -1.6601    3.3827   -6.5657 N   0  0  0  0  0  0  0  0  0  0  0  0
   -0.2383    3.3008   -6.9093 C   0  0  0  0  0  0  0  0  0  0  0  0
   -2.3586    4.5473   -6.6822 C   0  0  0  0  0  0  0  0  0  0  0  0
   -1.6745    5.7299   -7.2403 C   0  0  0  0  0  0  0  0  0  0  0  0
   -2.3858    6.9499   -7.3474 N   0  0  0  0  0  0  0  0  0  0  0  0
   -0.4026    5.6508   -7.6383 C   0  0  0  0  0  0  0  0  0  0  0  0
    0.6104    6.6420   -7.1259 C   0  0  0  0  0  0  0  0  0  0  0  0
   -0.5515    7.8192   -8.2931 O   0  0  0  0  0  0  0  0  0  0  0  0
   -1.6891    7.9826   -7.9054 C   0  0  0  0  0  0  0  0  0  0  0  0
   -0.2551   12.5561   -8.0569 C   0  0  0  0  0  0  0  0  0  0  0  0
   -1.2916   11.5366   -8.5335 C   0  0  0  0  0  0  0  0  0  0  0  0
   -1.4126   10.4124   -7.5028 C   0  0  0  0  0  0  0  0  0  0  0  0
   -2.3547    9.3290   -8.0328 C   0  0  0  0  0  0  0  0  0  0  0  0
    0.0793   10.7696   -5.3560 O   0  0  0  0  0  0  0  0  0  0  0  0
   -1.0814   11.0925   -5.2169 C   0  0  0  0  0  0  0  0  0  0  0  0
   -1.9720   10.9516   -6.2432 N   0  0  0  0  0  0  0  0  0  0  0  0
   -2.5426   13.0123   -1.8464 O   0  0  0  0  0  0  0  0  0  0  0  0
   -2.0963   13.7552   -2.6948 C   0  0  0  0  0  0  0  0  0  0  0  0
   -1.4938   13.1861   -3.9534 C   0  0  0  0  0  0  0  0  0  0  0  0
   -1.5699   11.6586   -3.9098 C   0  0  0  0  0  0  0  0  0  0  0  0
    1.9275   11.6716   -0.1419 O   0  0  0  0  0  0  0  0  0  0  0  0
   -0.7175   11.1514   -2.8166 N   0  0  0  0  0  0  0  0  0  0  0  0
   -2.1392   15.0898   -2.5119 N   0  0  0  0  0  0  0  0  0  0  0  0
   -2.6517    9.5859   -9.4068 O   0  0  0  0  0  0  0  0  0  0  0  0
   -3.5215    4.6108   -6.3329 O   0  0  0  0  0  0  0  0  0  0  0  0
   -0.1341   13.6803   -9.0876 C   0  0  0  0  0  0  0  0  0  0  0  0
    0.8081   14.7616   -8.5547 C   0  0  0  0  0  0  0  0  0  0  0  0
    0.4251   13.1156  -10.3950 C   0  0  0  0  0  0  0  0  0  0  0  0
   -4.5311    5.2958   -2.2563 N   0  0  0  0  0  0  0  0  0  0  0  0
   -4.7231    6.4669   -2.8952 C   0  0  0  0  0  0  0  0  0  0  0  0
   -5.4843    6.5257   -3.8408 O   0  0  0  0  0  0  0  0  0  0  0  0
   -4.0708    7.5729   -2.4854 N   0  0  0  0  0  0  0  0  0  0  0  0
   -5.9786    1.9418   -2.3406 O   0  0  0  0  0  0  0  0  0  0  0  0
   -6.3768    0.9833   -1.2274 S   0  0  0  0  0  0  0  0  0  0  0  0
   -7.2570    0.0330   -1.8119 O   0  0  0  0  0  0  0  0  0  0  0  0
   -5.1754    0.6222   -0.5599 O   0  0  0  0  0  0  0  0  0  0  0  0
   -7.2039    1.7755   -0.2251 O   0  0  0  0  0  0  0  0  0  0  0  0
    0.0261    2.8132   -0.8794 O   0  0  0  0  0  0  0  0  0  0  0  0
    0.9494    2.6462   -1.9572 C   0  0  0  0  0  0  0  0  0  0  0  0
  2  1  1  0      
  1  3  1  0      
  3  4  1  0      
  4  5  2  0      
  4  6  1  0      
  7  8  1  0      
  8  9  1  0      
  7 10  1  0      
  7  6  1  0      
 10 11  2  0      
 12 13  1  0      
 13 14  1  0      
 14 15  1  0      
 15 16  1  0      
 12 16  1  0      
 10 16  1  0      
 12 17  1  0      
 17 18  1  0      
 19 20  1  0      
 21 17  2  0      
 19 22  1  0      
 22 23  2  0      
 24 25  2  0      
 25 20  1  0      
 24 26  1  0      
 26 27  2  0      
 27 28  1  0      
 28 29  2  0      
 29 25  1  0      
 19 18  1  0      
 14 30  1  0      
  2 31  2  0      
  3 32  1  0      
 33 32  1  0      
 33 34  1  0      
 33 35  2  0      
 34 36  1  0      
 36 37  1  0      
 36 38  1  0      
 38 39  1  0      
 39 40  1  0      
 39 41  2  0      
 41 42  1  0      
 43 44  2  0      
 44 40  1  0      
 45 46  1  0      
 46 47  1  0      
 47 48  1  0      
 48 44  1  0      
 49 50  2  0      
 50 51  1  0      
 52 53  2  0      
 53 54  1  0      
 54 55  1  0      
 55 50  1  0      
 29 56  1  0      
 22 57  1  0      
 55 57  1  0      
 53 58  1  0      
 47 51  1  0      
 48 59  1  0      
 38 60  2  0      
 45 61  1  0      
 61 62  1  0      
 61 63  1  0      
  2 64  1  0      
 64 65  1  0      
 65 66  2  0      
 65 67  1  0      
  1 68  1  0      
 68 69  1  0      
 69 70  2  0      
 69 71  2  0      
 69 72  1  0      
 73 74  1  0      
  8 73  1  0      
M  STY  1   1 SUP
M  SLB  1   1   1
M  SAL   1  4  64  65  66  67
M  SBL   1  1  66
M  SMT   1 NHCONH2
M  SBV   1 66   -5.7172    4.4114
M  STY  1   2 SUP
M  SLB  1   2   2
M  SAL   2  5  68  69  70  71  72
M  SBL   2  1  70
M  SMT   2 OSO3H
M  SBV   2 70   -7.9907    5.8346
M  STY  1   3 SUP
M  SLB  1   3   3
M  SAL   3  2  73  74
M  SBL   3  1  76
M  SMT   3 OMe
M  SBV   3 76   -6.0734    6.6807
M  END
$$$$
