# Supplementary material for: Differential in Gel Electrophoresis (DIGE) Comparative Proteomic Analysis of Macrophages Cell Cultures in Response to Perthamide C Treatment
Source: MDPI journal article supplement (doi:10.3390/md11041288), 2013-04-17
Supplement: s2 [file s2]

marinedrugs-11-01288-s001.mol
  ChemDraw04151417212D

 74 76  0  0  0  0  0  0  0  0999 V2000
    4.0317   -2.2588    0.0000 C   0  0  0  0  0  0  0  0  0  0  0  0
    4.7461   -1.8463    0.0000 C   0  0  0  0  0  0  0  0  0  0  0  0
    3.3172   -1.8463    0.0000 C   0  0  0  0  0  0  0  0  0  0  0  0
    2.6027   -2.2588    0.0000 C   0  0  0  0  0  0  0  0  0  0  0  0
    2.6027   -3.0838    0.0000 O   0  0  0  0  0  0  0  0  0  0  0  0
    1.8882   -1.8463    0.0000 N   0  0  0  0  0  0  0  0  0  0  0  0
    1.1738   -2.2588    0.0000 C   0  0  0  0  0  0  0  0  0  0  0  0
    1.1738   -3.0838    0.0000 C   0  0  0  0  0  0  0  0  0  0  0  0
    1.8882   -3.4963    0.0000 C   0  0  0  0  0  0  0  0  0  0  0  0
    0.4593   -1.8463    0.0000 C   0  0  0  0  0  0  0  0  0  0  0  0
    0.4593   -1.0213    0.0000 O   0  0  0  0  0  0  0  0  0  0  0  0
   -1.6609   -2.2780    0.0000 C   0  0  0  0  0  0  0  0  0  0  0  0
   -1.6609   -3.1025    0.0000 C   0  0  0  0  0  0  0  0  0  0  0  0
   -0.9471   -3.5162    0.0000 C   0  0  0  0  0  0  0  0  0  0  0  0
   -0.2319   -3.1025    0.0000 C   0  0  0  0  0  0  0  0  0  0  0  0
   -0.2319   -2.2780    0.0000 N   0  0  0  0  0  0  0  0  0  0  0  0
   -2.2442   -1.6946    0.0000 C   0  0  0  0  0  0  0  0  0  0  0  0
   -2.2442   -0.8696    0.0000 N   0  0  0  0  0  0  0  0  0  0  0  0
   -2.9587   -0.4571    0.0000 C   0  0  0  0  0  0  0  0  0  0  0  0
   -3.6732   -0.8696    0.0000 C   0  0  0  0  0  0  0  0  0  0  0  0
   -2.9587   -2.1071    0.0000 O   0  0  0  0  0  0  0  0  0  0  0  0
   -2.9587    0.3679    0.0000 C   0  0  0  0  0  0  0  0  0  0  0  0
   -3.6732    0.7804    0.0000 O   0  0  0  0  0  0  0  0  0  0  0  0
   -4.3876    0.3679    0.0000 C   0  0  0  0  0  0  0  0  0  0  0  0
   -4.3876   -0.4571    0.0000 C   0  0  0  0  0  0  0  0  0  0  0  0
   -5.1021    0.7804    0.0000 C   0  0  0  0  0  0  0  0  0  0  0  0
   -5.8166    0.3679    0.0000 C   0  0  0  0  0  0  0  0  0  0  0  0
   -5.8166   -0.4571    0.0000 C   0  0  0  0  0  0  0  0  0  0  0  0
   -5.1021   -0.8696    0.0000 C   0  0  0  0  0  0  0  0  0  0  0  0
   -0.9471   -4.3412    0.0000 C   0  0  0  0  0  0  0  0  0  0  0  0
    4.7461   -1.0213    0.0000 O   0  0  0  0  0  0  0  0  0  0  0  0
    3.3172   -1.0213    0.0000 N   0  0  0  0  0  0  0  0  0  0  0  0
    4.0317   -0.6088    0.0000 C   0  0  0  0  0  0  0  0  0  0  0  0
    4.0317    0.2162    0.0000 C   0  0  0  0  0  0  0  0  0  0  0  0
    4.8567   -0.6088    0.0000 O   0  0  0  0  0  0  0  0  0  0  0  0
    3.3172    0.6287    0.0000 N   0  0  0  0  0  0  0  0  0  0  0  0
    2.6027    0.2162    0.0000 C   0  0  0  0  0  0  0  0  0  0  0  0
    3.3172    1.4537    0.0000 C   0  0  0  0  0  0  0  0  0  0  0  0
    2.6027    1.8662    0.0000 C   0  0  0  0  0  0  0  0  0  0  0  0
    1.8882    1.4537    0.0000 N   0  0  0  0  0  0  0  0  0  0  0  0
    2.6027    2.6912    0.0000 C   0  0  0  0  0  0  0  0  0  0  0  0
    1.8882    3.1037    0.0000 C   0  0  0  0  0  0  0  0  0  0  0  0
    1.1738    2.6912    0.0000 O   0  0  0  0  0  0  0  0  0  0  0  0
    1.1738    1.8662    0.0000 C   0  0  0  0  0  0  0  0  0  0  0  0
    0.4593    3.1037    0.0000 C   0  0  0  0  0  0  0  0  0  0  0  0
   -0.2552    2.6912    0.0000 C   0  0  0  0  0  0  0  0  0  0  0  0
   -0.2552    1.8662    0.0000 C   0  0  0  0  0  0  0  0  0  0  0  0
    0.4593    1.4537    0.0000 C   0  0  0  0  0  0  0  0  0  0  0  0
   -1.6841    2.6912    0.0000 O   0  0  0  0  0  0  0  0  0  0  0  0
   -1.6841    1.8662    0.0000 C   0  0  0  0  0  0  0  0  0  0  0  0
   -0.9696    1.4537    0.0000 N   0  0  0  0  0  0  0  0  0  0  0  0
   -2.3986    3.1037    0.0000 O   0  0  0  0  0  0  0  0  0  0  0  0
   -3.1130    2.6912    0.0000 C   0  0  0  0  0  0  0  0  0  0  0  0
   -3.1130    1.8662    0.0000 C   0  0  0  0  0  0  0  0  0  0  0  0
   -2.3986    1.4537    0.0000 C   0  0  0  0  0  0  0  0  0  0  0  0
   -5.1021   -1.6946    0.0000 O   0  0  0  0  0  0  0  0  0  0  0  0
   -2.3753    0.9512    0.0000 N   0  0  0  0  0  0  0  0  0  0  0  0
   -3.8275    3.1037    0.0000 N   0  0  0  0  0  0  0  0  0  0  0  0
    0.4593    0.6287    0.0000 O   0  0  0  0  0  0  0  0  0  0  0  0
    4.0317    1.8662    0.0000 O   0  0  0  0  0  0  0  0  0  0  0  0
    0.4593    3.9287    0.0000 C   0  0  0  0  0  0  0  0  0  0  0  0
   -0.2552    4.3412    0.0000 C   0  0  0  0  0  0  0  0  0  0  0  0
    1.1738    4.3412    0.0000 C   0  0  0  0  0  0  0  0  0  0  0  0
    5.8166   -3.7018    0.0000 N   0  0  0  0  0  0  0  0  0  0  0  0
    5.1021   -3.2893    0.0000 C   0  0  0  0  0  0  0  0  0  0  0  0
    5.1021   -2.4643    0.0000 O   0  0  0  0  0  0  0  0  0  0  0  0
    4.3877   -3.7018    0.0000 N   0  0  0  0  0  0  0  0  0  0  0  0
    2.8287   -2.6911    0.0000 O   0  0  0  0  0  0  0  0  0  0  0  0
    3.5432   -3.1036    0.0000 S   0  0  0  0  0  0  0  0  0  0  0  0
    3.9557   -2.3891    0.0000 O   0  0  0  0  0  0  0  0  0  0  0  0
    3.1307   -3.8181    0.0000 O   0  0  0  0  0  0  0  0  0  0  0  0
    4.2577   -3.5161    0.0000 O   0  0  0  0  0  0  0  0  0  0  0  0
    1.8881   -2.6700    0.0000 O   0  0  0  0  0  0  0  0  0  0  0  0
    2.4775   -3.0103    0.0000 C   0  0  0  0  0  0  0  0  0  0  0  0
  2  1  1  0      
  1  3  1  0      
  3  4  1  0      
  4  5  2  0      
  4  6  1  0      
  7  8  1  0      
  8  9  1  0      
  7 10  1  0      
  7  6  1  1      
 10 11  2  0      
 12 13  1  0      
 13 14  1  0      
 14 15  1  0      
 15 16  1  0      
 12 16  1  0      
 10 16  1  0      
 12 17  1  1      
 17 18  1  0      
 19 20  1  0      
 21 17  2  0      
 19 22  1  0      
 22 23  2  0      
 24 25  2  0      
 25 20  1  0      
 24 26  1  0      
 26 27  2  0      
 27 28  1  0      
 28 29  2  0      
 29 25  1  0      
 19 18  1  1      
 14 30  1  1      
  2 31  2  0      
  3 32  1  6      
 33 32  1  0      
 33 34  1  0      
 33 35  2  0      
 34 36  1  0      
 36 37  1  0      
 36 38  1  0      
 38 39  1  0      
 39 40  1  0      
 39 41  2  0      
 41 42  1  0      
 43 44  2  0      
 44 40  1  0      
 45 46  1  0      
 46 47  1  0      
 47 48  1  0      
 48 44  1  0      
 49 50  2  0      
 50 51  1  0      
 52 53  2  0      
 53 54  1  0      
 54 55  1  0      
 55 50  1  0      
 29 56  1  0      
 22 57  1  0      
 55 57  1  1      
 53 58  1  0      
 47 51  1  6      
 48 59  1  6      
 38 60  2  0      
 45 61  1  0      
 61 62  1  0      
 61 63  1  0      
  2 64  1  0      
 64 65  1  0      
 65 66  2  0      
 65 67  1  0      
  1 68  1  1      
 68 69  1  0      
 69 70  2  0      
 69 71  2  0      
 69 72  1  0      
 73 74  1  0      
  8 73  1  0      
M  STY  1   1 SUP
M  SLB  1   1   1
M  SAL   1  4  64  65  66  67
M  SBL   1  1  66
M  SMT   1 NHCONH2
M  SBV   1 66   -5.7172    4.4114
M  STY  1   2 SUP
M  SLB  1   2   2
M  SAL   2  5  68  69  70  71  72
M  SBL   2  1  70
M  SMT   2 OSO3H
M  SBV   2 70   -7.9907    5.8346
M  STY  1   3 SUP
M  SLB  1   3   3
M  SAL   3  2  73  74
M  SBL   3  1  76
M  SMT   3 OMe
M  SBV   3 76   -6.0734    6.6807
M  END
